# Supplementary material for: Guidelines vs Generative AI in CKD Patient Education: The Role of Prompt Engineering and Expert Blinded Evaluation
Source: Research Square preprint supplement (doi:10.21203/rs.3.rs-7507934/v1), 2025-09-22
Supplement: Supplementary file 1 [file eba99f6f472c4513700e9fe0.docx]

| Selected Questions |
| --- |
| 1. Is chronic kidney disease rare condition? 2. What does it mean chronic kidney disease? 3. Is the dialysis only treatment for kidney disease? 4. Is chronic kidney disease genetic? 5. What are the symptoms of advanced chronic kidney disease? 6. Is drinking a lot of water good for the kidneys, especially in chronic kidney disease? 7. Could my back pain be due to my kidneys? 8. If I am at risk for kidney disease, is there nothing you can do about it? 9. Is chronic kidney disease curable? 10. What are the risk factors of chronic kidney disease? 11. What are the causes of chronic kidney disease? 12. As a chronic kidney disease patient, how should I eat? 13. What tests and procedures diagnose chronic kidney disease? 14. Is potassium harmful for the bodies? 15. Can I do excercise as a chronic kidney patient? |

**Supplementary Table 1: Selected questions.**

# **Supplementary Table 2: CLEAR TOOL Scoring Rubric**

Each response was evaluated across five domains: Completeness, Lack of False Information, Evidence Support, Appropriateness, and Relevance. Each criterion was rated on a 1 to 5 Likert scale. The rubric below was used to guide evaluators in assigning scores consistently.

| **Criterion** | **Score Range (1–5)** | **Scoring Guidelines** |
| --- | --- | --- |
| **Completeness** | 1 = Severely incomplete 5 = Fully comprehensive | Does the response address all major components of the question, providing sufficient detail? |
| **Lack of False Information** | 1 = Contains clear misinformation 5 = No false or misleading content | Is the response factually accurate and free from medical errors or misleading statements? |
| **Evidence Support** | 1 = No evidence or unsubstantiated claims 5 = Cites or reflects guideline-based evidence | Is the content grounded in current clinical guidelines or scientific consensus, even if not explicitly cited? |
| **Appropriateness** | 1 = Inappropriate tone or language 5 = Clinically appropriate and respectful | Is the tone professional, and is the information suitable for patient education without inducing fear or confusion? |
| **Relevance** | 1 = Largely irrelevant 5 = Fully aligned with the question asked | Does the response stay on-topic and directly address the patient's question without unnecessary digressions? |
